# Supplementary material
Source: publisher site journal article supplement (https://www.dovepress.com/article/443134)
Supplement: Supplementary file 1 [file get_supplementary_file.php]

ORIGINAL RESEARCH

Ghelfi et al

**PD1 and TIM3 expression is associated with very early hepatocellular carcinoma recurrence after percutaneous thermal ablation**

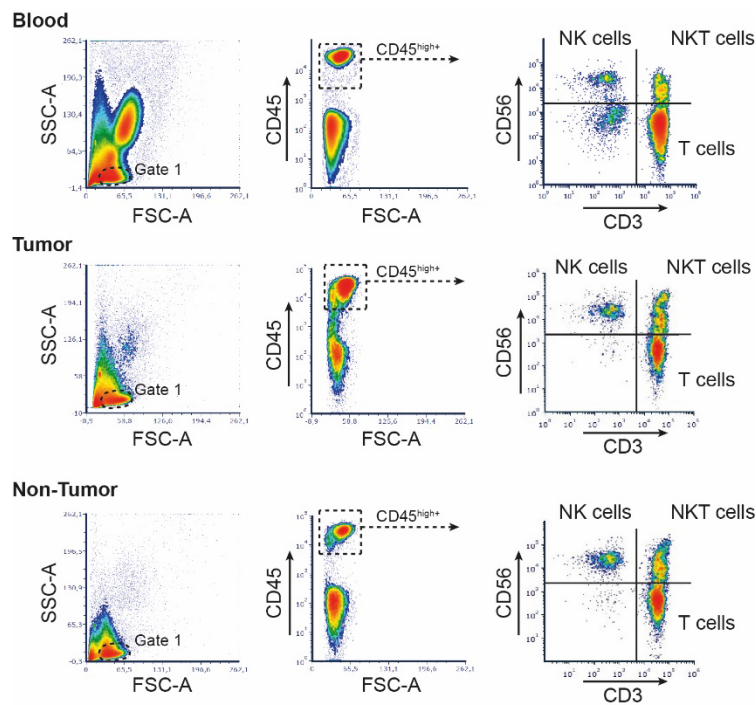

**Figure S1** Gating strategy for flow cytometry analysis.

Fresh samples of peripheral blood, nontumoral and intratumoral liver tissue were stained for FACS analyses. After exclusion of dead cells and doublets, lymphocytes were gated based on SSC and FSC and then based on CD45 expression. We identified CD3<sup>+</sup>CD56<sup>+</sup> NK cells, CD3<sup>+</sup>CD56<sup>+</sup> NKT cells and CD3<sup>+</sup>CD56<sup>-</sup> classical T cells as previously described <sup>1</sup>.

Reference:

1. Macek Jilkova Z, Aspod C, Kurma K, et al. Immunologic Features of Patients With Advanced Hepatocellular Carcinoma Before and During Sorafenib or Anti-programmed Death-1/Programmed Death-L1 Treatment. *Clin Transl Gastroenterol*. Jul 2019;10(7):e00058. doi:10.14309/ctg.0000000000000058

**Table S1** The baseline frequency of immune cells in peripheral blood, nontumoral and intratumoral liver tissue

|                                                   | Prolonged recurrence-free group (n=22) |             | Very early recurrence group (n=9) |             | P value |
|---------------------------------------------------|----------------------------------------|-------------|-----------------------------------|-------------|---------|
| <b>Blood</b>                                      |                                        |             |                                   |             |         |
| % of CD45 <sup>+</sup> cells, <i>median [IQR]</i> |                                        |             |                                   |             |         |
| T cells                                           | 63.2                                   | [56.8-69.0] | 62.5                              | [56.8-71.3] | ns      |
| CD4 <sup>+</sup> T cells                          | 46.4                                   | [39.8-49.7] | 46.0                              | [43.2-51.1] | ns      |
| CD8 <sup>+</sup> T cells                          | 16.7                                   | [10.8-21.4] | 19.2                              | [11.5-21.2] | ns      |
| NKT cells                                         | 1.8                                    | [1.1-6.6]   | 5.2                               | [1.6-13.0]  | ns      |
| NK cells                                          | 13.1                                   | [7.5-18.6]  | 10.0                              | [5.3-15.7]  | ns      |
| % of T cells, median [IQR]                        |                                        |             |                                   |             |         |
| CD4 <sup>+</sup> T cells                          | 76.4                                   | [62.6-81.4] | 70.7                              | [69.4-79.5] | ns      |
| CD8 <sup>+</sup> T cells                          | 23.7                                   | [18.6-37.4] | 29.3                              | [20.5-30.6] | ns      |
| <b>Non-tumoral</b>                                |                                        |             |                                   |             |         |
| weight of biopsy sample in mg, median [IQR]       | 8.6                                    | [7.4-9.2]   | 8.6                               | [5.5-8.6]   | ns      |
| % of CD45 <sup>+</sup> cells, <i>median [IQR]</i> |                                        |             |                                   |             |         |
| T cells                                           | 44.3                                   | [36.0-49.0] | 38.4                              | [31.0-50.0] | ns      |
| CD4 <sup>+</sup> T cells                          | 19.7                                   | [17.2-23.2] | 20.9                              | [15.6-24.6] | ns      |
| CD8 <sup>+</sup> T cells                          | 22.8                                   | [17.5-26.4] | 17.7                              | [14.8-21.8] | ns      |
| NKT cells                                         | 14.7                                   | [8.1-22.5]  | 15.6                              | [7.4-29.9]  | ns      |
| NK cells                                          | 23.0                                   | [21.3-34.6] | 31.5                              | [25.0-32.7] | ns      |
| % of T cells, median [IQR]                        |                                        |             |                                   |             |         |
| CD4 <sup>+</sup> T cells                          | 49.4                                   | [41.0-56.9] | 55.6                              | [49.3-59.5] | ns      |
| CD8 <sup>+</sup> T cells                          | 50.6                                   | [43.1-59.0] | 44.4                              | [40.5-50.7] | ns      |
| <b>Intra-tumoral</b>                              |                                        |             |                                   |             |         |
| weight of biopsy sample in mg, median [IQR]       | 7.4                                    | [5.0-7.4]   | 7.4                               | [6.8-7.4]   | ns      |
| % of CD45 <sup>+</sup> cells, <i>median [IQR]</i> |                                        |             |                                   |             |         |
| T cells                                           | 52.0                                   | [44.9-65.5] | 53.9                              | [47.6-56.5] | ns      |
| CD4 <sup>+</sup> T cells                          | 33.0                                   | [26.6-41.1] | 35.6                              | [28.8-43.2] | ns      |
| CD8 <sup>+</sup> T cells                          | 18.9                                   | [13.0-21.9] | 17.7                              | [13.8-20.6] | ns      |
| NKT cells                                         | 15.4                                   | [7.9-17.6]  | 15.7                              | [6.6-24.2]  | ns      |
| NK cells                                          | 15.9                                   | [11.3-20.4] | 21.3                              | [14.5-23.6] | ns      |
| % of T cells, median [IQR]                        |                                        |             |                                   |             |         |
| CD4 <sup>+</sup> T cells                          | 63.7                                   | [55.0-75.3] | 64.3                              | [59.7-76.2] | ns      |
| CD8 <sup>+</sup> T cells                          | 34.3                                   | [24.8-43.6] | 36.7                              | [23.8-40.3] | ns      |

n/a: not applicable; ns: not significant; IQR: Interquartile range;

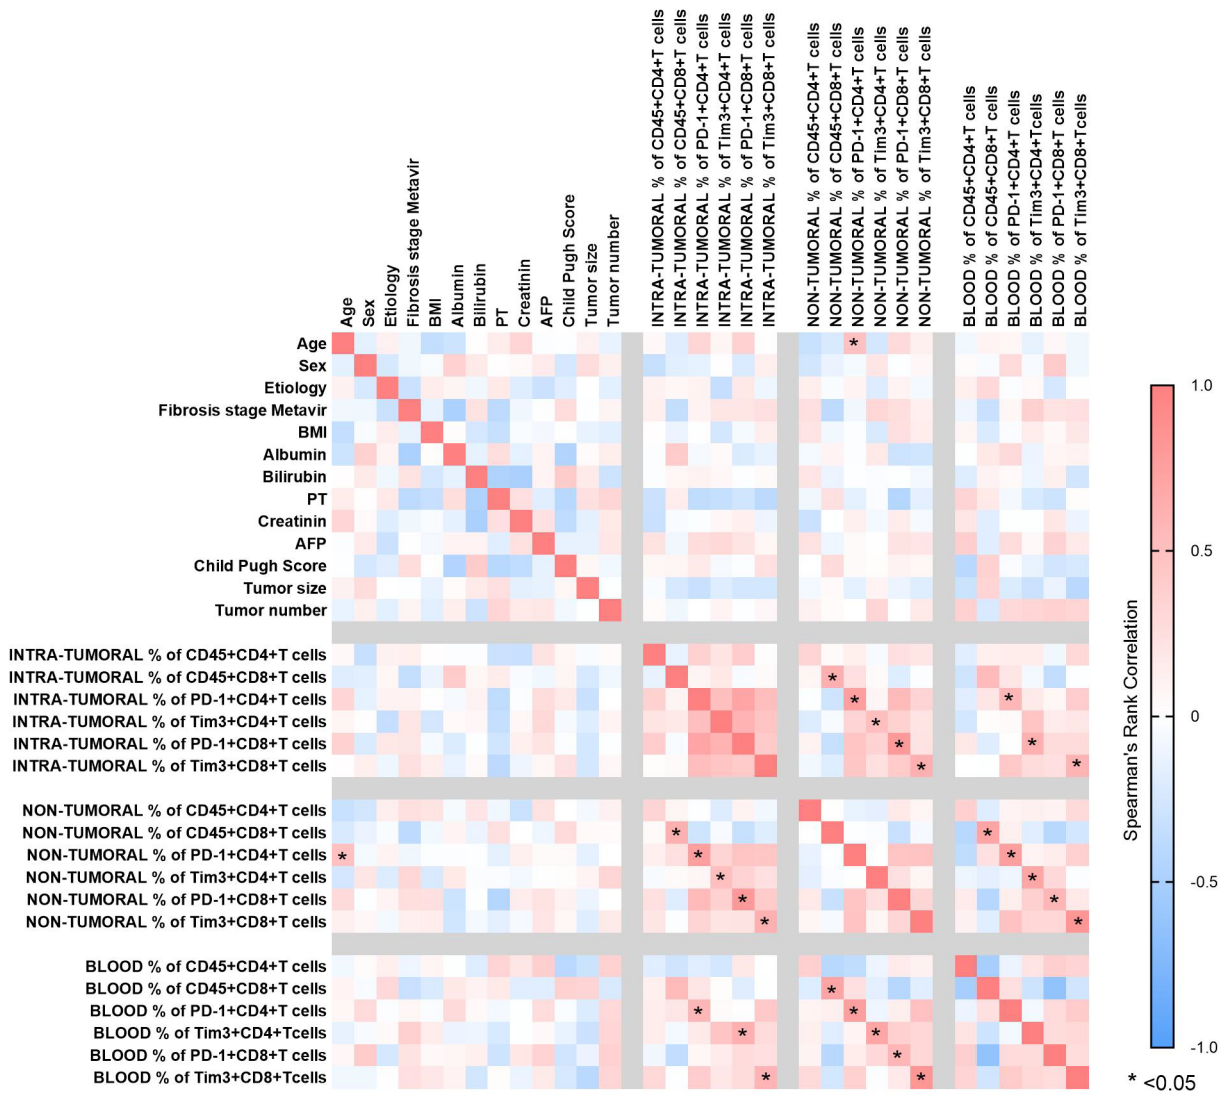

**Figure S2 Correlation matrix of HCC patient clinical characteristics and immune signature at baseline**

Heatmap of correlation of patient characteristics and frequencies of intra-tumoral, non-tumoral and blood T cells from HCC patients at the baseline before the ablation procedure. Color corresponds to Spearman's rank correlation coefficient  $r$ ,  $n = 31$ . \*  $p < 0.05$  represent statistically significant correlations after the adjustment.
